# Supplementary material for: Validation of the Revised Myeloma Comorbidity Index and other comorbidity scores in a multicenter German study group multiple myeloma trial
Source: PubMed Central journal article supplement — Haematologica. 2020 May 15;106(3):875–80. doi: 10.3324/haematol.2020.254235 (PMC7928005; doi:10.3324/haematol.2020.254235), 2020-05-15
Supplement: 2020_254235-Disclosures_Contributions.pdf [file 2020_254235-Disclosures_Contributions.pdf]

Haematologica  
HAEMATOL/2020/254235  
Version 4

Validation of the revised myeloma comorbidity index and other comorbidity scores in a multicenter German study group multiple myeloma trial

Sandra Maria Dold, Mandy-Deborah Möller, Gabriele Ihorst, Christian Langer, Wolfram Pönisch, Lars-Olof Mügge, Stefan Knop, Johannes Jung, Christine Greil, Ralph Wäsch, and Monika Engelhardt

Disclosures: SMD, MM, GI, CL, WP, LOM, SK, JJ, CG, RW have no financial or other relationships that might lead to a conflict of interest. ME has received educational and trial support and honoraria and consultancy fees from Amgen, BMS, Janssen, Takeda, entirely unrelated to this study.

Contributions: MM and SMD acquired the data. SMD analyzed the data. SMD and ME wrote the manuscript. SMD, RW, and ME designed the project. CL, LOM, WP, SK provided access to patient data and patient assessment. GI controlled the statistics. MM, JJ, CG, CL, LOM, WP, SK, GI, RW and ME revised the manuscript. RW and ME supported the project.
