# Supplementary material for: Validation of the Revised Myeloma Comorbidity Index and other comorbidity scores in a multicenter German study group multiple myeloma trial
Source: PubMed Central journal article supplement — Haematologica. 2020 May 15;106(3):875–80. doi: 10.3324/haematol.2020.254235 (PMC7928005; doi:10.3324/haematol.2020.254235), 2020-05-15
Supplement: 2020_254235_DOLD_SUPPL.pdf [file 2020_254235_DOLD_SUPPL.pdf]

**Validation of the Revised Myeloma Comorbidity Index and other comorbidity scores in a multicenter German study group multiple myeloma trial**

Sandra Maria Dold,<sup>1,2,3\*</sup> Mandy-Deborah Möller,<sup>1,3</sup> Gabriele Ihorst,<sup>4</sup> Christian Langer,<sup>5</sup> Wolfram Pönisch,<sup>6</sup> Lars-Olof Mügge,<sup>7,8</sup> Stefan Knop,<sup>9</sup> Johannes Jung,<sup>1,3</sup> Christine Greil,<sup>1,3</sup> Ralph Wäsch<sup>1,3</sup> and Monika Engelhardt<sup>1,3</sup>

*\*SMD and ME contributed equally to this work.*

<sup>1</sup>Department of Medicine I Hematology and Oncology, University of Freiburg Medical Center, Faculty of Medicine, Freiburg; <sup>2</sup>Faculty of Biology, University of Freiburg, Freiburg; <sup>3</sup>Comprehensive Cancer Center Freiburg (CCCF), University of Freiburg Medical Center, Faculty of Medicine, Freiburg; <sup>4</sup>Clinical Trials Unit, University of Freiburg Medical Center, Freiburg; <sup>5</sup>Hematology, Oncology & Rheumatology, University of Ulm Medical Center, Ulm; <sup>6</sup>Hematology & Oncology, University of Leipzig Medical Center, Leipzig; <sup>7</sup>Hematology & Oncology, University of Jena Medical Center, Jena; <sup>8</sup>Hematology & Oncology, Heinrich-Braun-Klinikum Zwickau, Zwickau; and <sup>9</sup>Hematology & Oncology, University of Würzburg Medical Center, Würzburg, Germany

Correspondence: MONIKA ENGELHARDT - [monika.engelhardt@uniklinik-freiburg.de](mailto:monika.engelhardt@uniklinik-freiburg.de)

doi:10.3324/haematol.2020.254235

## Supplements

### Methods

#### *Patient population and study design*

This prospective study, done in 284 consecutive MM patients at the time of initial diagnosis or first presentation at 5 German Study Group Multiple Myeloma (DSMM) centres (Freiburg, Würzburg, Ulm, Jena, Leipzig), was registered at the German Clinical Trials Register ([www.clinicaltrials.gov](http://www.clinicaltrials.gov)) (DRKS-00003868). The primary objective was to validate the R-MCI<sup>1</sup> in a multicentre MM cohort. Secondary objectives included the distribution of the R-MCI as compared to the International myeloma working group (IMWG) frailty score<sup>2</sup> and Charlson Comorbidity Index (CCI) (Suppl. Table 1). The analysis was carried out according to the guidelines of the Declaration of Helsinki Principles and Good Clinical Practice. All patients gave their written informed consent for institutional-initiated research studies and analyses of clinical outcome studies conforming to the institutional review board guidelines.

#### *Assessment*

The comorbidities assessed in the R-MCI are depicted in Suppl. Table 2, and the IMWG and CCI comorbidities in Suppl. Table 1. Cytogenetics were assessed as followed: del(17p13), del(13q14), t(4;14), t(14;16); t(14;20), hypodiploidy, c-myc and chromosome 1 aberrations were defined as unfavorable, and t(11;14), hyperdiploidy and a normal karyotype as favorable cytogenetics. Genetic abnormalities were detected by fluorescence in situ hybridization (FISH). Renal function was determined via estimated glomerular filtration rate (eGFR by MDRD) and lung disease via lung function test. Pulmonary obstruction and/or restriction were distinguished with the aid of parameters such as forced expiratory volume in one second (FEV<sub>1</sub>) and Tiffeneau-Pinelli index (FEV<sub>1</sub>/FVC). Pulmonary obstruction was graded through the impairment of the FEV<sub>1</sub>: a FEV<sub>1</sub> of ≥80% was scored as mild, <80-50% as moderate and <50% as severe. The KPS was defined as normal (100%), mildly (90%), moderately (80%) or more substantially impaired (≤70%). Frailty and disability were assessed in order to get a more precise determination of patients' physical condition. The Fried definition for frailty was utilized in adaptation (as described in the manuscript text, Table 1A and [http://www.myelomacomorbidityindex.org/en\\_calc.html](http://www.myelomacomorbidityindex.org/en_calc.html)), which takes into account the added presence of weakness, poor endurance, low physical activity and slow gait speed.<sup>3,4</sup> The assessments of the Freiburg cohort were performed by an oncogeriatrically trained staff member (SMD) and was identically performed throughout the study period. Patient characteristics included age, stage, creatinine, bone marrow infiltration and cytogenetics (Table 1A+B).

#### *Statistical analysis*

The R-MCI was assessed and compared to the IMWG and CCI. These scores were also applied in order to compare fit vs. frail patients. Data were analyzed using GraphPadPrism V5.03 and SAS 9.2 (SAS Institute Inc. USA).

### References

1. Engelhardt M, Domm A-S, Dold SM, et al. A concise revised Myeloma Comorbidity Index as a valid prognostic instrument in a large cohort of 801 multiple myeloma patients. *Haematologica* 2017;102(5):910–921.
2. Palumbo A, Bringhen S, Mateos M-V, et al. Geriatric assessment predicts survival and toxicities in elderly myeloma patients: an International Myeloma Working Group report. *Blood* 2015;125(13):2068–2074.
3. Rodriguez-Mañas L, Fried LP. Frailty in the clinical scenario. *Lancet Lond Engl* 2015;385(9968):e7-9.
4. Xue Q-L, Walston JD, Fried LP, Beamer BA. Prediction of risk of falling, physical disability, and frailty by rate of decline in grip strength: the women's health and aging study. *Arch Intern Med* 2011;171(12):1119–1121.
5. Charlson ME, Pompei P, Ales KL, MacKenzie CR. A new method of classifying prognostic comorbidity in longitudinal studies: development and validation. *J Chronic Dis* 1987;40(5):373–383.

**Supplementary Table 1. International comorbidity scores: IMWG, CCI and revised Myeloma Comorbidity Index (MCI)**

|                          | <b>Revised MCI<br/>(Weighted)</b>                                                                                                                                                                                                                                                                                | <b>IMWG-frailty score</b>                                                                                                                                        | <b>CCI<br/>(Weighted)</b>                                                                                                                                                                                                                                                                                                                                                                                                                                                                                                                                                                                                                                                                                                                                                   |
|--------------------------|------------------------------------------------------------------------------------------------------------------------------------------------------------------------------------------------------------------------------------------------------------------------------------------------------------------|------------------------------------------------------------------------------------------------------------------------------------------------------------------|-----------------------------------------------------------------------------------------------------------------------------------------------------------------------------------------------------------------------------------------------------------------------------------------------------------------------------------------------------------------------------------------------------------------------------------------------------------------------------------------------------------------------------------------------------------------------------------------------------------------------------------------------------------------------------------------------------------------------------------------------------------------------------|
| <b>References</b>        | Engelhardt 2017 <sup>1</sup>                                                                                                                                                                                                                                                                                     | Palumbo 2015 <sup>2</sup>                                                                                                                                        | Charlson 1987 <sup>5</sup>                                                                                                                                                                                                                                                                                                                                                                                                                                                                                                                                                                                                                                                                                                                                                  |
| <b>Factors</b>           | <ul style="list-style-type: none"> <li>- Moderate-severe lung disease [1]</li> <li>- Severe renal disease [1]</li> <li>- Reduced KPS:<br/>80-90% [2]<br/>≤70% [3]</li> <li>- Age &gt;60 - ≤70y [1]<br/>Age &gt;70y [2]</li> <li>- Moderate-severe frailty [1]</li> <li>- Unfavorable cytogenetics [1]</li> </ul> | <ul style="list-style-type: none"> <li>- Age &gt;76 - ≤80y [1]<br/>Age &gt;80y [2]</li> <li>- ADL ≤4 [1]</li> <li>- IADL ≤5 [1]</li> <li>- CCI ≥2 [1]</li> </ul> | <ul style="list-style-type: none"> <li>- Myocardial infarction [1]</li> <li>- Congestive heart failure [1]</li> <li>- Peripheral vascular disease [1]</li> <li>- Cerebrovascular disease [1]</li> <li>- Dementia [1]</li> <li>- Chronic pulmonary disease [1]</li> <li>- Connective tissue disease [1]</li> <li>- Peptic ulcer disease [1]</li> <li>- Mild liver disease [1]</li> <li>- Mild diabetes [1]</li> <li>- Hemiplegia [2]</li> <li>- Moderate-severe renal disease [2]</li> <li>- Diabetes with end organ damage [2]</li> <li>- Tumor without metastases (exclude if &gt;5y from diagnosis) [2]</li> <li>- Leukemia [2]</li> <li>- Lymphoma [2]</li> <li>- Moderate-severe liver disease [2]</li> <li>- Metastatic solid tumor [6]</li> <li>- AIDS [6]</li> </ul> |
| <b>Number of factors</b> | 6                                                                                                                                                                                                                                                                                                                | 4 (33 questions)                                                                                                                                                 | 18                                                                                                                                                                                                                                                                                                                                                                                                                                                                                                                                                                                                                                                                                                                                                                          |
| <b>Max. points</b>       | 9                                                                                                                                                                                                                                                                                                                | 5                                                                                                                                                                | 33 (+1 per decade from an age of 50)                                                                                                                                                                                                                                                                                                                                                                                                                                                                                                                                                                                                                                                                                                                                        |

**Abbreviations:** CCI, Charlson Comorbidity Index; IMWG, International myeloma working group; KPS, Karnofsky Performance Status; pts, patients; R-MCI, revised myeloma comorbidity score; y, years.

Scoring rules:

a) R-MCI/IMWG/CCI: Addition of present comorbidities, sum score

**Supplementary Table 2. Revised myeloma comorbidity score (R-MCI): multivariate with inclusion, definitions and weighting**

| R-MCI risk factors determined via multivariate analysis <sup>1</sup> | Definition      | Score             |
|----------------------------------------------------------------------|-----------------|-------------------|
| 1. Renal disease (eGFR <sub>MDRD</sub> ) <sup>a</sup>                | ≥90             | 0                 |
|                                                                      | 60-89           | 0                 |
|                                                                      | <60             | 1                 |
| 2. Lung disease                                                      | No/mild         | 0                 |
|                                                                      | Moderate/severe | 1                 |
| 3. KPS                                                               | 100%            | 0                 |
|                                                                      | 80-90%          | 2                 |
|                                                                      | ≤70%            | 3                 |
| 4. Age (years)                                                       | <60             | 0                 |
|                                                                      | 60-69           | 1                 |
|                                                                      | ≥70             | 2                 |
| 5. Frailty                                                           | No/mild         | 0                 |
|                                                                      | Moderate        | 1                 |
|                                                                      | Severe          | 1                 |
| 6. Cytogenetics                                                      | Favorable       | 0                 |
|                                                                      | Unfavorable     | 1                 |
|                                                                      | Unavailable     | 0                 |
| Σ=sum score                                                          |                 | Max. 9            |
| Fit (R-MCI 0-3)                                                      |                 | Group allocations |
| Intermediate-fit (R-MCI 4-6)                                         |                 |                   |
| Frail (R-MCI 7-9)                                                    |                 |                   |

**Abbreviations:**

KPS, Karnofsky Performance Status; eGFR<sub>MDRD</sub>, estimated glomerular filtration rate by MDRD (Modification of Diet in Renal Disease).

<sup>a</sup>eGFR calculated as MDRD  $186 \times (\text{serum creatinine level [mg/dl]})^{-1.154} \times (\text{age [y]})^{-0.203} \times (0.742 \text{ if female, } 1.21 \text{ if black person})$
